# Supplementary material
Source: publisher figshare collection journal article supplement (https://acs.figshare.com/ndownloader/files/4776991)
Supplement: Supplementary file 1 [file 4776991]

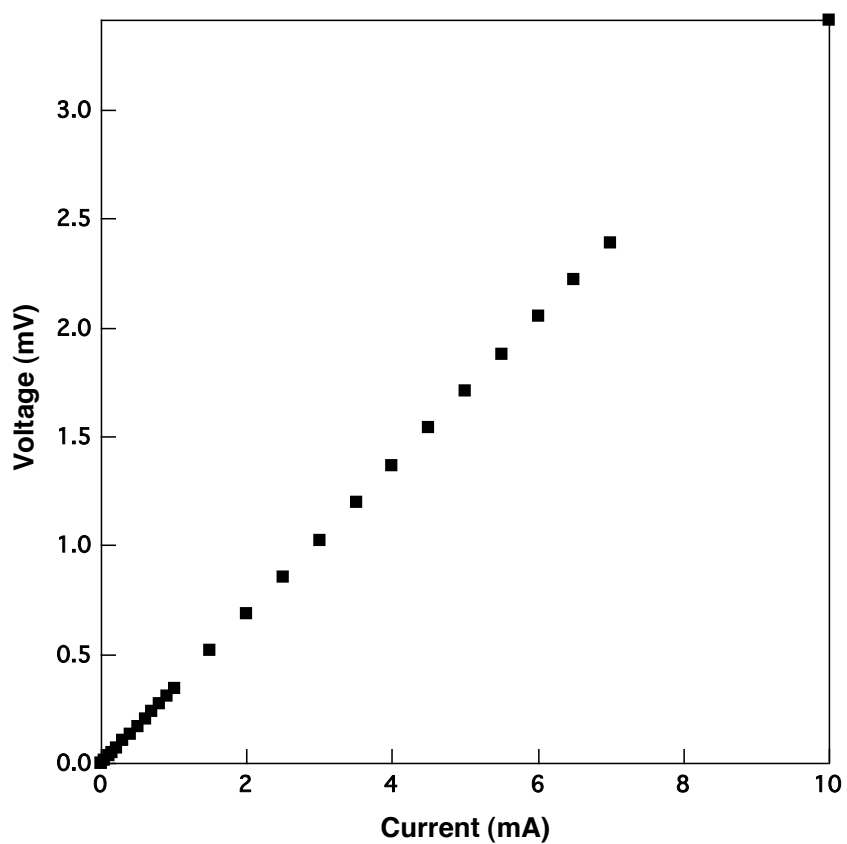

**Figure S1 I-V curve of a contact between the surface of the SWNH/p and the Pd electrodes in vacuo at 303K.**

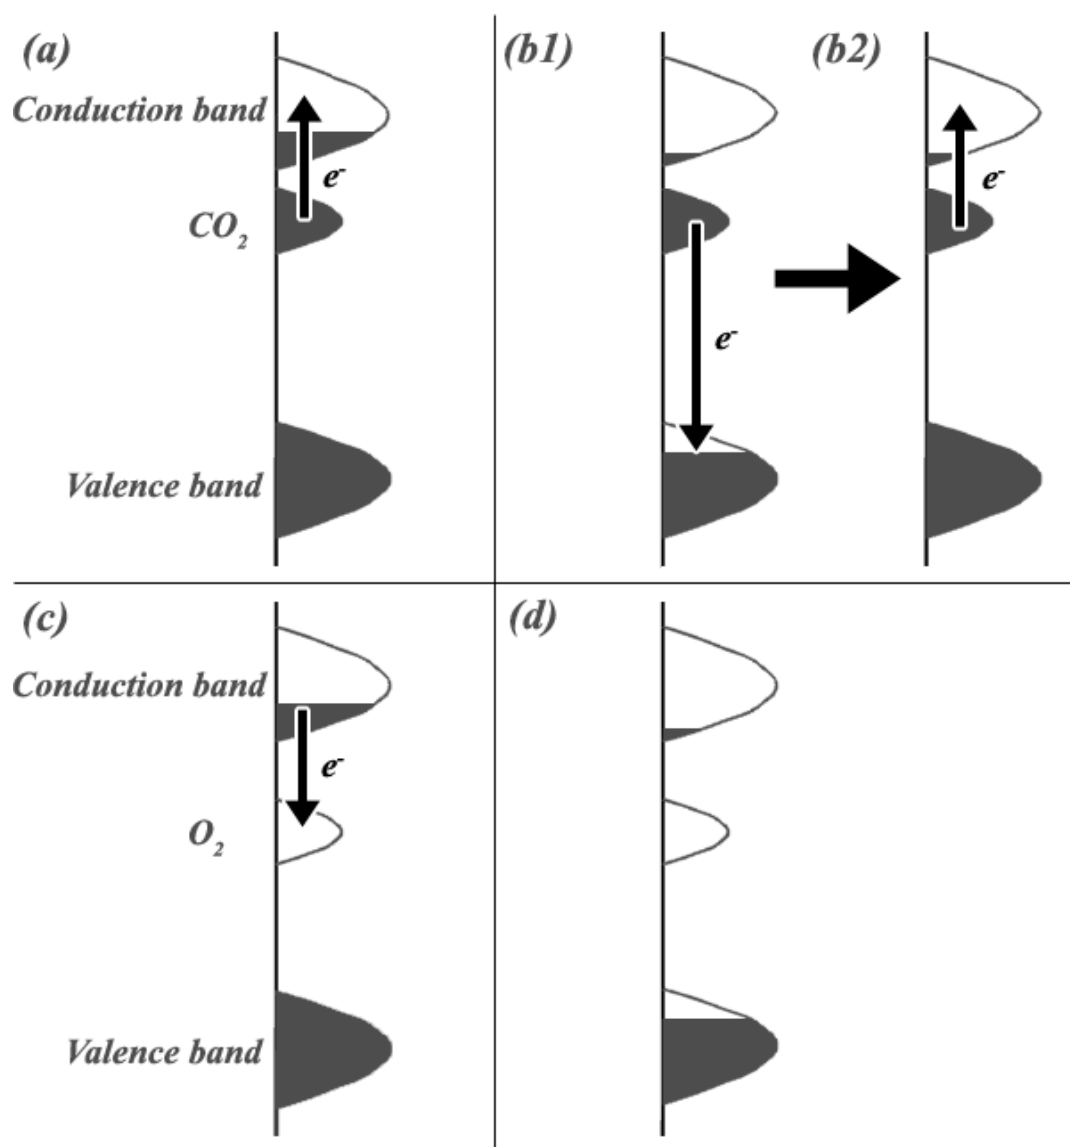

**Figure S2 Qualitative band models for electrical conductivity changes of SWNH/p and ox-SWNH/p on  $\text{CO}_2$  and  $\text{O}_2$  adsorption. (a) Model for  $\text{CO}_2$  adsorption on SWNH/p. The carrier electrons are injected to the conduction band from the  $\text{CO}_2$  chemisorbed band. (b) Model for  $\text{CO}_2$  adsorption on ox-SWNH/p. As ox-SWNH has almost no pentagons, holes in the valence band are carriers. When  $\text{CO}_2$  is chemisorbed, electron transfer from  $\text{CO}_2$  annihilates those holes (b1). After the annihilation on further  $\text{CO}_2$  adsorption, the electron transfer from  $\text{CO}_2$  to the conduction band induces the electrical conductivity increase. (c) Model for  $\text{O}_2$  adsorption on SWNH/p. Carrier electrons in the conduction band are trapped by the chemisorbed  $\text{O}_2$ . (d) Model for  $\text{O}_2$  adsorption on ox-SWNH/p. The electron dose not transfer between  $\text{O}_2$  chemisorption level and both bands.**
